# Supplementary material for: Multilevel analysis of social, climatic and entomological factors that influenced dengue occurrence in three municipalities in Colombia
Source: PubMed Central journal article supplement — One Health. 2021 Mar 5;12:100234. doi: 10.1016/j.onehlt.2021.100234 (PMC8025047; doi:10.1016/j.onehlt.2021.100234), 2021-03-05
Supplement: mmc1.pdf [file mmc1.pdf]

Supplementary 1

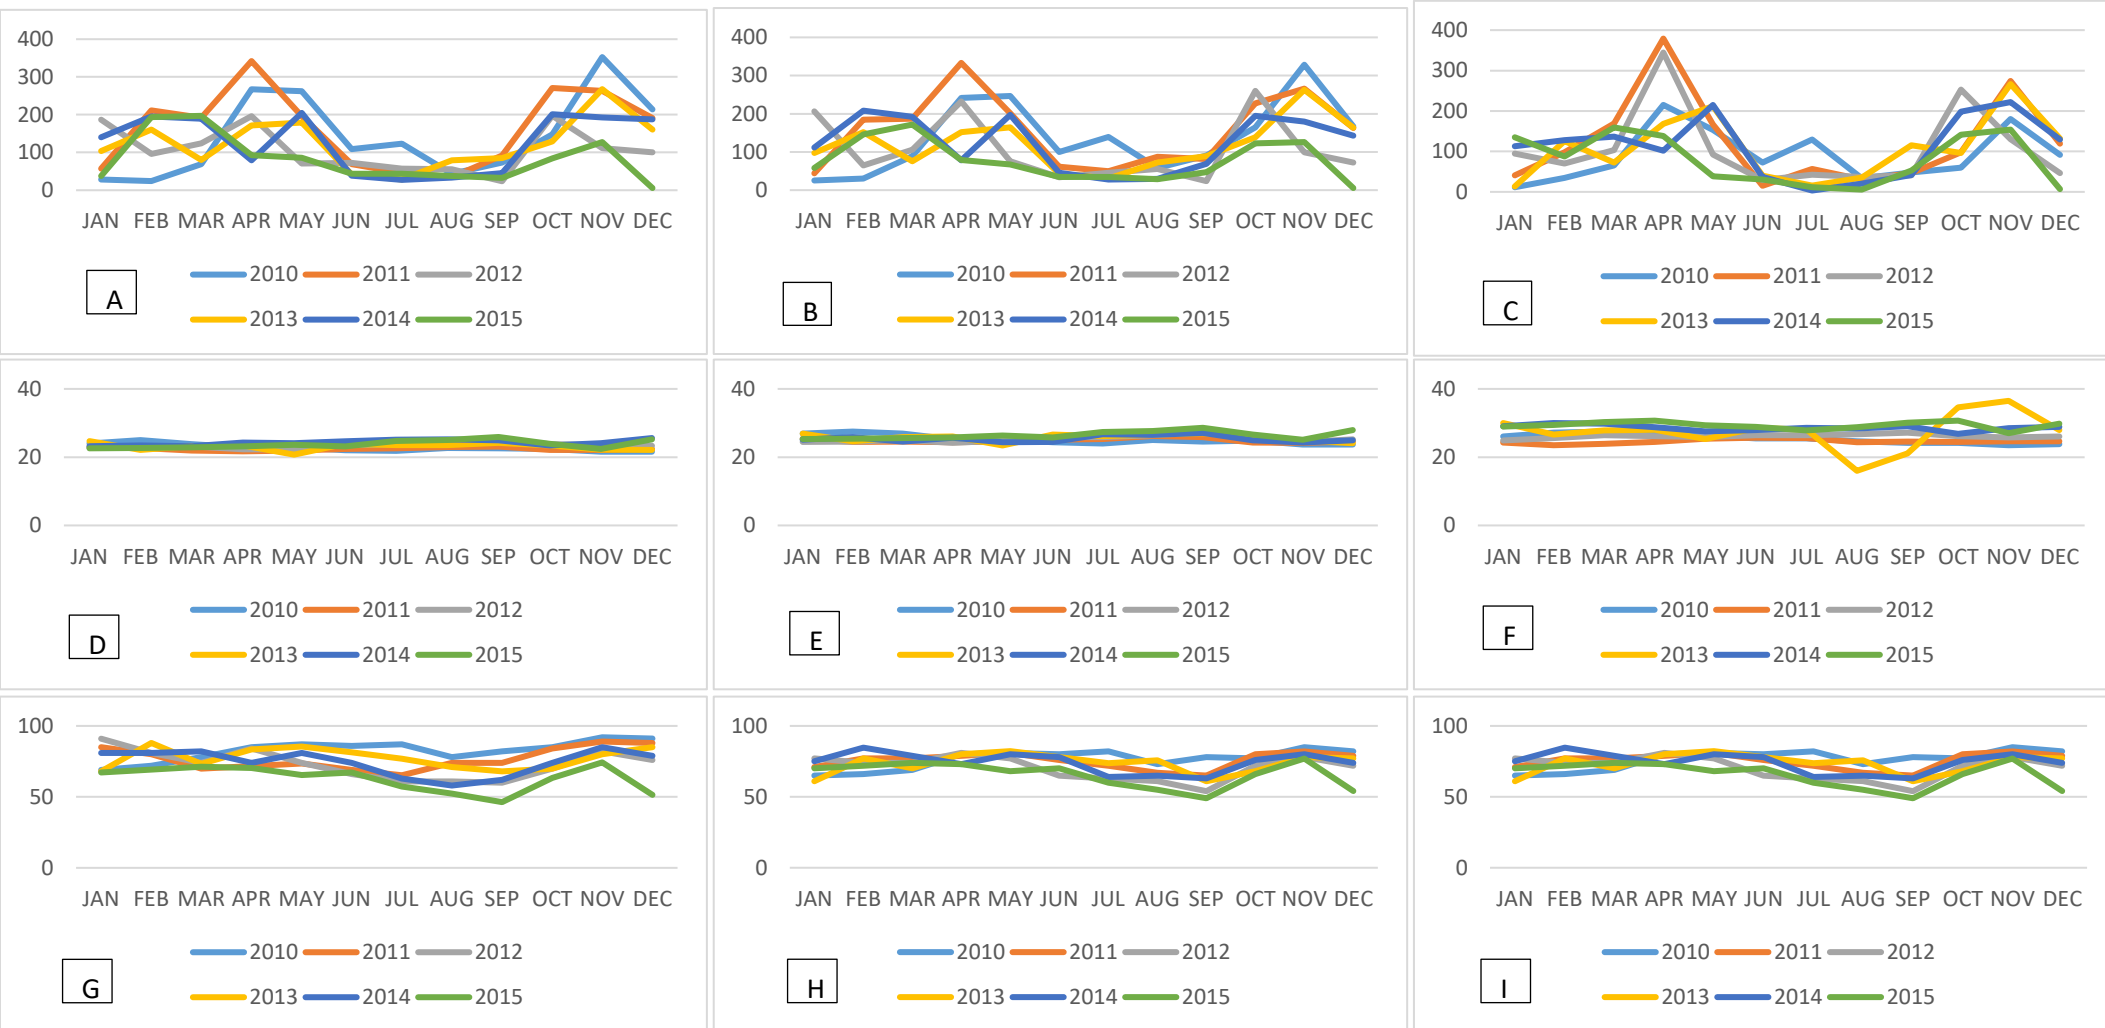

Figure 2. Behavior of climate variables. Rainfall in La Mesa (A), Anapoima (B) and Apulo (C). Temperature in La Mesa (D), Anapoima (E) and Apulo (F). Relative humidity in La Mesa (G), Anapoima (H) and Apulo (I)

**Supplementary 2**

|               | <b>Precipitation (mm)</b> | <b>Temperature (°C)</b> | <b>Relative humidity (%)</b> |
|---------------|---------------------------|-------------------------|------------------------------|
| <b>Low</b>    | <=128                     | <=24                    | <=64.8                       |
| <b>Medium</b> | 129 – 253                 | 24 – 27.3               | 64.8 – 83.3                  |
| <b>High</b>   | >=254                     | >=27.4                  | > 83.3                       |

Table 4. Cut-off points of the categories of each climatic variable of the climate combinations.

| <b>Precipitation</b> | <b>Temperature</b> | <b>Relative humidity</b> | <b>Dengue cases (1)</b> | <b>Month (2)</b> | <b>Average number of cases per month (3)</b> |
|----------------------|--------------------|--------------------------|-------------------------|------------------|----------------------------------------------|
| High                 | High               | High                     | 40                      | 2                | 20,00                                        |
| High                 | Medium             | High                     | 179                     | 10               | 17,90                                        |
| High                 | Medium             | Medium                   | 231                     | 15               | 15,40                                        |
| High                 | Low                | High                     | 208                     | 15               | 13,87                                        |
| High                 | Low                | Medium                   | 330                     | 26               | 12,69                                        |
| Medium               | High               | High                     | 20                      | 2                | 10,00                                        |
| Medium               | High               | Medium                   | 59                      | 6                | 9,83                                         |
| Medium               | Medium             | High                     | 65                      | 7                | 9,29                                         |
| Medium               | Medium             | Medium                   | 241                     | 26               | 9,27                                         |
| Medium               | Low                | High                     | 64                      | 7                | 9,14                                         |
| Medium               | Low                | Medium                   | 32                      | 4                | 8,00                                         |
| Low                  | High               | High                     | 338                     | 47               | 7,19                                         |
| Low                  | High               | Medium                   | 25                      | 4                | 6,25                                         |
| Low                  | High               | Low                      | 5                       | 1                | 5,00                                         |
| Low                  | Medium             | High                     | 43                      | 9                | 4,78                                         |
| Low                  | Medium             | Medium                   | 65                      | 16               | 4,06                                         |
| Low                  | Medium             | Low                      | 21                      | 11               | 1,91                                         |
| Low                  | Low                | High                     | 6                       | 4                | 1,50                                         |
| Low                  | Low                | Medium                   | 4                       | 3                | 1,33                                         |
| Low                  | Low                | Low                      | 1                       | 1                | 1,00                                         |
| High                 | High               | Medium                   | 0                       | 0                | 0,00                                         |
| High                 | High               | Low                      | 0                       | 0                | 0,00                                         |
| High                 | Medium             | Low                      | 0                       | 0                | 0,00                                         |
| High                 | Low                | Low                      | 0                       | 0                | 0,00                                         |
| Medium               | High               | Low                      | 0                       | 0                | 0,00                                         |
| Medium               | Medium             | Low                      | 0                       | 0                | 0,00                                         |
| Medium               | Medium             | Low                      | 0                       | 0                | 0,00                                         |

(1) Total number of dengue (with or without warning signs) and severe dengue cases in these municipalities

between 2010 and 2015 = 1977 cases

(2) Number of months where the three categories of climatic variables are repeated within the 6 analyzed years

(3) N/A = Not applicable

Table 5. All climate combinations with dengue cases

|                                         | <b>Estimate</b> | <b>Std. Error</b> | <b>Z value</b> | <b>Pr(&gt; z )*</b> |
|-----------------------------------------|-----------------|-------------------|----------------|---------------------|
| <b>Intercept</b>                        | 1.327e-13       | 1.463e+00         | 0.000          | 1.0000              |
| <b>Combination High-Medium-Low</b>      | 2.996e+00       | 1.653e+00         | 1.812          | 0.0700              |
| <b>Combination Medium-Low-High</b>      | 2.885e+00       | 1.503e+00         | 1.919          | 0.0549              |
| <b>Combination Medium-Low-Medium</b>    | 2.734e+00       | 1.490e+00         | 1.835          | 0.0664              |
| <b>Combination Low-Medium-Low</b>       | 2.629e+00       | 1.490e+00         | 1.765          | 0.0776              |
| <b>Combination Low-Low-Medium</b>       | 2.541e+00       | 1.479e+00         | 1.719          | 0.0857              |
| <b>Combination Medium-High-High</b>     | 2.877e-01       | 1.664e+00         | 0.173          | 0.8627              |
| <b>Combination Medium-High-Medium</b>   | 2.213e+00       | 1.522e+00         | 1.454          | 0.1460              |
| <b>Combination Medium-Medium-High</b>   | 2.228e+00       | 1.522e+00         | 1.464          | 0.1432              |
| <b>Combination Medium-Medium-Medium</b> | 2.227e+00       | 1.479e+00         | 1.506          | 0.1322              |

\* p – value <0,1

Table 6. Some Coeficiente of fit of the Negative binomial generalized linear model of the climatic combinations of table 2.

Supplementary 3

Wald chi2(6) = 1353.89

Log likelihood = -650.12926

Prob > chi2 = 0.0000

| Dengue cases            | Coef.     | Std. Err. | z     | P> z  | [95% Conf. Interval] |           |
|-------------------------|-----------|-----------|-------|-------|----------------------|-----------|
| Precipitation           | .0004517  | .0003821  | 1.18  | 0.237 | -0.0002972           | 0.0012006 |
| <b>Temperature</b>      | .0765703  | .0196039  | 3.91  | 0.000 | 0.0381474            | 0.1149932 |
| Relative humidity       | .0001109  | .0037483  | 0.03  | 0.976 | -0.0072358           | 0.0074575 |
| Childhood               | .0013265  | .0117191  | 0.11  | 0.910 | -0.0216425           | 0.0242955 |
| Urban area              | .0690348  | .0091077  | 7.58  | 0.000 | 0.0511841            | 0.0868855 |
| Contributive healthcare | .0073421  | .0064658  | 1.14  | 0.256 | -0.0053305           | 0.0200148 |
| _cons                   | -.6330169 | .7028784  | -0.90 | 0.368 | -2.010633            | 0.7445994 |
| <b>Municipality</b>     |           |           |       |       |                      |           |
| var(_cons)              | .1260117  | .1091608  |       |       | .0230694             | .6883124  |

LR test vs. Poisson model: chibar2(01) = 48.50 Prob >= chibar2 = .0000

Table 7. The best model of the Poisson Multilevel analysis

Wald chi2(6) = 1396.97

Log likelihood = -640.51314

Prob > chi2 = 0.0000

| Dengue cases            | Coef.     | Std. Err. | z     | P> z  | [95% Conf. Interval] |          |
|-------------------------|-----------|-----------|-------|-------|----------------------|----------|
| Precipitation           | .0003657  | .0003845  | 0.95  | 0.342 | -.000388             | .0011193 |
| <b>Temperature</b>      | .0848804  | .0195347  | 4.35  | 0.000 | .0465931             | .1231677 |
| Relative humidity       | -.0011595 | .0037368  | -0.31 | 0.756 | -.0084836            | .0061646 |
| Adulthood               | .0340282  | .007683   | 4.43  | 0.000 | .0189697             | .0490867 |
| Urban area              | .0540998  | .0094121  | 5.75  | 0.000 | .0356524             | .0725473 |
| Contributive healthcare | .0057352  | .0064246  | 0.89  | 0.372 | -.0068567            | .0183272 |
| _cons                   | -.7463442 | .7005043  | -1.07 | 0.287 | -2.119307            | .6266191 |
| <b>Municipality</b>     |           |           |       |       |                      |          |
| var(_cons)              | .1278992  | .1109175  |       |       | .0233714             | .6999255 |

LR test vs. Poisson model: chibar2(01) = 44.05 Prob >= chibar2 = 0.0000

Table 8. An alternative model of Poisson Multilevel analysis.
